# Supplementary material
Source: publisher figshare collection journal article supplement (https://gsapubs.figshare.com/ndownloader/files/22276923)
Supplement: Supplementary file 1 [file 22276923]

## Sheet: Cpx-based thermobarometer
EMPA Spot Num. of Cpx	Cpx type	Location	SiO2	TiO2	Al2O3	FeOt	MnO	MgO	CaO	Na2O	K2O	Cr2O3	T(C)	error-T(±C)	P(kbar)	error-P(±kbar)	Depth(km)
M-09-01	Cpx phenocryst in UPR	Mibale	54.911	0.386	0.327	3.502	0.07	17.451	23.432	0.125	-	0.056	1057.9	29.1646	3.99917	0.655711	15.1038
M-09-02	Cpx phenocryst in UPR	Mibale	55.156	0.534	0.415	3.364	0.037	17.551	23.539	0.14	-	0.057	1060.21	13.3091	4.28393	0.315036	16.1793
M-09-03	Cpx phenocryst in UPR	Mibale	54.657	0.228	0.358	2.808	0.087	17.861	23.009	0.11	0.013	0.115	1060.8	13.7273	4.26813	0.323725	16.1196
M-09-04	Cpx phenocryst in UPR	Mibale	54.77	0.39	0.446	2.59	0.085	17.66	23.76	0.149	-	0.156	1057.6	22.7722	4.04342	0.516639	15.2709
C-04-2-1	Cpx phenocryst in UPR	Chazi	52.368	0.523	2.155	7.399	0.089	14.319	22.503	0.352	-	0.034	1129.96	21.5245	7.53714	0.688118	28.4657
C-04-2-2	Cpx phenocryst in UPR	Chazi	52.999	0.678	2.489	8.393	0.081	13.619	22.028	0.392	0.017	-	1137.12	19.7791	8.1374	0.662884	30.7327
C-04-2-3	Cpx phenocryst in UPR	Chazi	53.509	0.391	1.948	7.146	0.102	14.677	22.219	0.356	0.001	-	1131.57	21.4731	7.58643	0.687664	28.6519
C-04-2-4	Cpx phenocryst in UPR	Chazi	53.254	0.678	2.284	7.767	0.135	14.456	22.108	0.297	-	-	1126.26	25.8875	6.70521	0.759386	25.3237
C-04-2-5	Cpx phenocryst in UPR	Chazi	51.904	0.326	2.015	7.23	0.044	14.262	22.052	0.294	0.017	-	1124.07	25.5035	6.71499	0.752409	25.3607
S-05-01	Cpx phenocryst in UPR	Sailipu	55.419	0.204	0.079	4.857	0.09	17.727	20.9	0.204	-	0.081	1200.15	36.4959	11.9462	1.21889	45.1173
S-05-02	Cpx phenocryst in UPR	Sailipu	55.021	0.102	0.095	3.585	0.103	16.93	22.257	0.189	0.007	0.173	1191.04	37.7586	11.4096	1.23359	43.0911
S-05-03	Cpx phenocryst in UPR	Sailipu	54.264	0.412	1.235	4.924	0.067	17.193	19.978	0.266	0.012	0.69	1218.98	32.2568	13.627	1.16789	51.4653
S-05-04	Cpx phenocryst in UPR	Sailipu	53.426	0.381	1.494	4.922	0.112	17.223	20.823	0.323	0.005	0.872	1223.04	30.0502	14.5662	1.14117	55.0126
S-05-05	Cpx phenocryst in UPR	Sailipu	50.295	1.34	3.258	6.282	0.104	15.457	21.177	0.261	0.059	0.646	1215.58	32.0417	13.5281	1.16314	51.0919
S-05-06	Cpx phenocryst in UPR	Sailipu	52.234	0.226	1.961	5.163	0.094	17.971	20.274	0.204	0.036	0.751	1206.95	36.5158	12.1987	1.22246	46.071
S-05-07	Cpx phenocryst in UPR	Sailipu	50.892	0.409	4.387	7.954	0.052	15.145	19.384	0.314	0.112	0.104	1236.02	38.6722	14.9127	1.25388	56.3211
S-05-08	Cpx phenocryst in UPR	Sailipu	52.209	0.359	2.411	6.498	0.059	17.402	20.466	0.192	0.036	0.275	1204.05	37.9962	11.8419	1.24331	44.7236
S-05-09	Cpx phenocryst in UPR	Sailipu	52.55	0.41	2.394	6.058	0.108	17.448	19.662	0.212	0.086	0.561	1213.04	36.076	12.5141	1.21895	47.2622
S-05-10	Cpx phenocryst in UPR	Sailipu	52.351	0.338	2.263	5.878	0.056	17.915	20.294	0.188	0.028	0.693	1204.62	31.1114	11.7568	1.16248	44.4022
S-02-01*	Cpx core in lherzolite xenoliths	Sailipu	53.847	0.243	1.059	4.262	0.078	18.212	20.242	0.258	0.026	0.815	1349.61	17.8865	19.4966	2.37859	73.6333
S-02-02*	Cpx core in lherzolite xenoliths	Sailipu	54.171	0.266	1.338	4.283	0.034	17.912	20.92	0.322	0.032	0.933	1348.8	14.7986	20.021	2.28965	75.614
S-02-03*	Cpx core in lherzolite xenoliths	Sailipu	54.862	0.405	1.183	3.244	0.034	17.873	21.836	0.2	0.04	0.809	1340.79	17.5189	19.0527	2.1752	71.9568
S-02-04*	Cpx core in lherzolite xenoliths	Sailipu	52.862	0.22	2.376	5.427	0.085	16.92	20.574	0.556	-	1.06	1315.77	8.98736	17.4429	2.13077	65.877
S-02-05*	Cpx core in lherzolite xenoliths	Sailipu	53.48	0.367	2.05	4.75	0.135	17.36	20.64	0.481	0.032	1.128	1341.16	11.6064	19.9702	2.37743	75.4218
S-02-06*	Cpx core in lherzolite xenoliths	Sailipu	54.24	0.361	2.13	5.47	0.169	18.86	19.7	0.466	0.032	1.014	1323.63	11.7043	17.2633	2.30477	65.1987
S-02-07*	Cpx core in lherzolite xenoliths	Sailipu	52.89	0.282	1.533	4.75	0.139	17.63	19.93	0.329	0.008	1.002	1355.41	16.9628	20.8241	2.02997	78.6468
S-02-08*	Cpx core in lherzolite xenoliths	Sailipu	53.84	0.288	1.274	4.31	0.136	18.15	20.87	0.259	0.018	0.879	1347.69	32.5927	19.8478	2.58097	74.9599
S-02-09*	Cpx core in lherzolite xenoliths	Sailipu	52.78	0.371	2.1	5.16	0.149	17.62	19.6	0.516	0.015	1.094	1335.75	19.5396	19.0747	1.98698	72.04
S-02-10*	Cpx core in lherzolite xenoliths	Sailipu	52.97	0.33	1.188	4	0.139	18.23	21.05	0.266	0.025	0.909	1354.9	18.0903	21.0491	2.50847	79.4965
S-02-11*	Cpx core in lherzolite xenoliths	Sailipu	54.28	0.275	1.085	4.48	0.139	18.78	20.23	0.235	0.02	0.716	1328.08	13.72	16.9678	2.30869	64.0827
S-02-12*	Cpx core in lherzolite xenoliths	Sailipu	52.78	0.387	2.1	5.03	0.16	16.92	20.73	0.419	0.023	1.091	1334.34	19.1922	19.7474	2.44386	74.5804
S-02-13*	Cpx core in lherzolite xenoliths	Sailipu	53.09	0.334	2.03	5.2	0.141	17.3	19.85	0.503	0.014	1.041	1329.02	8.65913	18.3726	2.31869	69.3882
S-02-14*	Cpx core in lherzolite xenoliths	Sailipu	53.52	0.434	2.04	5.05	0.145	17.53	20.1	0.455	-	1.052	1332.73	20.4703	18.8477	2.1964	71.1828
S-02-15*	Cpx core in lherzolite xenoliths	Sailipu	52.32	0.356	1.99	4.51	0.28	17.09	20.59	0.461	0.013	1.101	1341.01	19.7286	20.1145	2.33783	75.9668
Note: Spot number with symbol * represents that temperature and pressure results were calculated by the single Cpx thermometer and barometer. Results of other spots were calculated by the clinopyroxene–liquid thermobarometer.

## Sheet: Other thermometers
								Equation 2 of Sisson & Grove (1993)	Equation 13 of Putirka (2008)	Liquid Mg-thermometer of Helz & Thornber (1987)	Olivine Compositions (wt%)													Liquid (Glass) Composition - in Weight Percent
								T(C )	T(C )	T(C )	EMPA Spot Num. of Ol	SiO2	TiO2	Al2O3	FeOt	MnO	MgO	CaO	Na2O	K2O	Cr2O3	P2O5		Whole-rock Num.	SiO2	TiO2	Al2O3	FeOt	MnO	MgO	CaO	Na2O	K2O	P2O5
								1251.94	1193.49	1166.16	SLP15-05-1-1	41.061	0.049	0.221	24.304	0.113	33.708	0.466	0.047	0.046	0.053	0.071		SLP15	56.2	1.364	12.25	5.90269	0.106	7.57	5.2	1.77	5.8	0.9
								1230.03	1193.49	1166.16	SLP15-05-1-2	38.626	0.076	-	22.832	0.099	37.174	0.11	0.004	0.019	0.097	0.034		SLP15	56.2	1.364	12.25	5.90269	0.106	7.57	5.2	1.77	5.8	0.9
								1231.55	1193.49	1166.16	SLP15-02-6	38.727	0.12	0.048	23.531	0.049	37.162	0.098	0.022	0.007	0.034	0.024		SLP15	56.2	1.364	12.25	5.90269	0.106	7.57	5.2	1.77	5.8	0.9
								1111.9	1111.17	1103.24	CZ20-13-1_1	41.125	0.091	0.002	9.696	0.027	48.946	0.045	0.004	0.003	-	0.011		CZ20	59.75	1.064	13.23	4.74195	0.077	4.44	5.83	2.42	7.05	0.63
								1117	1111.17	1103.24	CZ20-13-1_2	41.344	0.011	0.001	9.675	0.01	48.589	-	0.013	0.012	-	0.021		CZ20	59.75	1.064	13.23	4.74195	0.077	4.44	5.83	2.42	7.05	0.63
								1126.6	1111.17	1103.24	CZ20-13-1_3	42.229	0.01	0.02	10.177	0.038	47.748	0.035	0.003	0.015	-	0.034		CZ20	59.75	1.064	13.23	4.74195	0.077	4.44	5.83	2.42	7.05	0.63
								1154.89	1111.17	1103.24	CZ20-13-1_4	41.664	0.045	-	10.114	0.071	48.517	0.026	0.019	-	-	0.011		CZ20	59.75	1.064	13.23	4.74195	0.077	4.44	5.83	2.42	7.05	0.63
								1116.35	1111.17	1103.24	CZ20-13-1_5	41.633	0.034	0.02	10.278	0.078	48.316	0.01	0.008	-	0.004	0.035		CZ20	59.75	1.064	13.23	4.74195	0.077	4.44	5.83	2.42	7.05	0.63
								1059.16	1084.87	1083.14	MBL15-09-11-1	37.498	0.139	0.049	26.75	0.215	34.446	0.22	-	0.03	0.073	-		MBL15	61.33	1.074	13.27	4.85712	0.067	3.44	4.008	2.467	7.782	0.611
								1054.16	1084.87	1083.14	MBL15-09-11-2	38.762	0.043	0.077	24.455	0.176	35.775	0.122	-	0.032	0.024	0.01		MBL15	61.33	1.074	13.27	4.85712	0.067	3.44	4.008	2.467	7.782	0.611
